# Supplementary material
Source: Frontiers journal article supplement (https://www.frontiersin.org/articles/476494)
Supplement: Data_Sheet_1.pdf [file Data_Sheet_1.pdf]

## *Supplementary Material*

# **A Highly Selective NIR Fluorescent Turn-on Probe for Hydroxyl Radical and Its Application in Living Cell Images**

**Xingyu Qu<sup>1,2</sup>, Wenting Song<sup>1</sup>, Zhen Shen<sup>1\*</sup>,**

<sup>1</sup> State Key Laboratory of Coordination Chemistry, Nanjing National Laboratory of Microstructures, Nanjing 210093, P. R. China.

<sup>2</sup> Department of Chemistry and Chemical Engineering, Jinzhong University, Jinzhong, Shanxi, 030619, P. R. China

**\* Correspondence:**

Zhen Shen  
[zshen@nju.edu.cn](mailto:zshen@nju.edu.cn)

### **Contents:**

**Figure S1** <sup>1</sup>H NMR spectra of compound **2a**.

**Figure S2** <sup>1</sup>H-<sup>1</sup>H COSY NMR spectrum of compound **2a**.

**Figure S3** <sup>1</sup>H NMR spectra of compound **2b**.

**Figure S4** <sup>1</sup>H-<sup>1</sup>H COSY NMR spectrum of compound **2b**.

**Figure S5** <sup>13</sup>C NMR spectrum of compound **2b**.

**Figure S6** <sup>1</sup>H NMR spectra of compound **ox-2a**.

**Figure S7** <sup>1</sup>H-<sup>1</sup>H COSY NMR spectrum of compound **ox-2a**

**Figure S8** <sup>13</sup>C NMR spectrum of compound **ox-2a**.

**Figure S9** MALDI-TOF MS spectrum of compound **2a**.

**Figure S10** MALDI-TOF MS spectrum of compound **2b**.

**Figure S11** MALDI-TOF MS spectrum of compound **ox-2a**.

**Figure S12** Changes in the fluorescence spectrum of **2b** as the •OH concentration is increased.

**Figure S13** The fluorescence intensity of **2b** is observed at 665 nm upon addition of various RON/ROS.

**Figure S14** Fluorescence intensity ratio histograms of **2b** dispersed in DMSO with the adding of corresponding radicals and subsequent adding of  $\bullet\text{OH}$ .

**Figure S15** Fluorescence intensity of probe **2b** after reacting with  $\text{OH}$  as a function of  $\text{OH}$  concentration.

**Figure S16**  $^{31}\text{P}$  NMR of **2b** with different concentrations of  $\text{OH}$  in  $\text{DMSO-d}_6$ .

**Figure S17** Confocal fluorescence and brightfield images of Hela cells.

**Table S1** Crystal data and structure refinement for **ox-2a**.

**Table S2** Optical properties of **2a**, **2b** and **ox-2a** in various solvents at 298 K.

## Supplementary Figures and Table

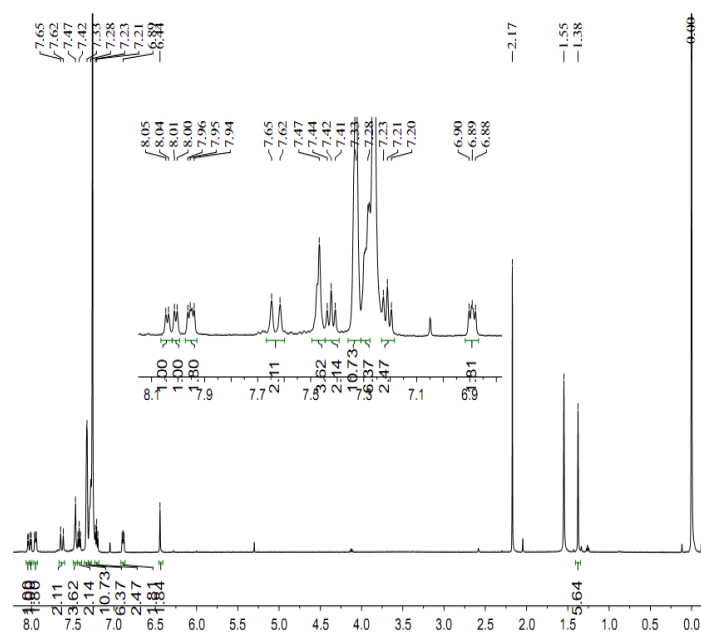

**Figure S1** <sup>1</sup>H NMR spectrum of compound **2a** (CDCl<sub>3</sub>, 298 K)

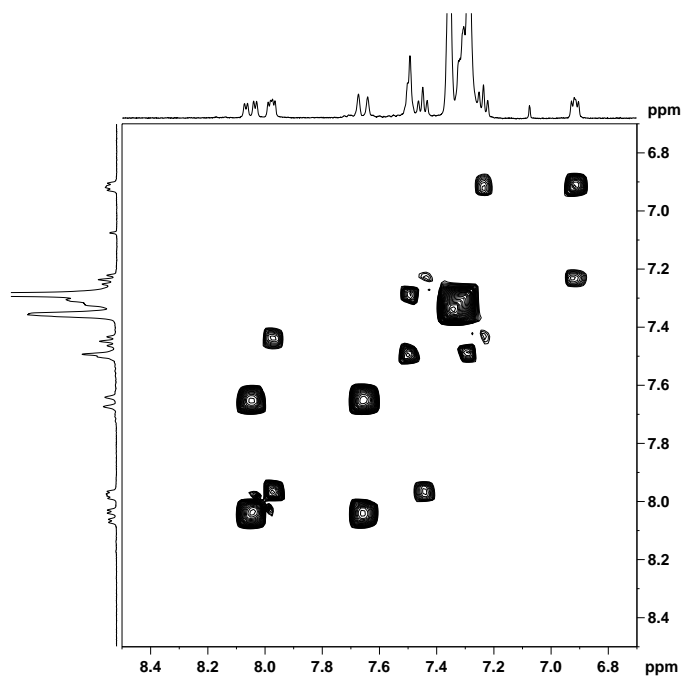

**Figure S2** <sup>1</sup>H-<sup>1</sup>H COSY spectrum of compound **2a** (CDCl<sub>3</sub>, 298 K)

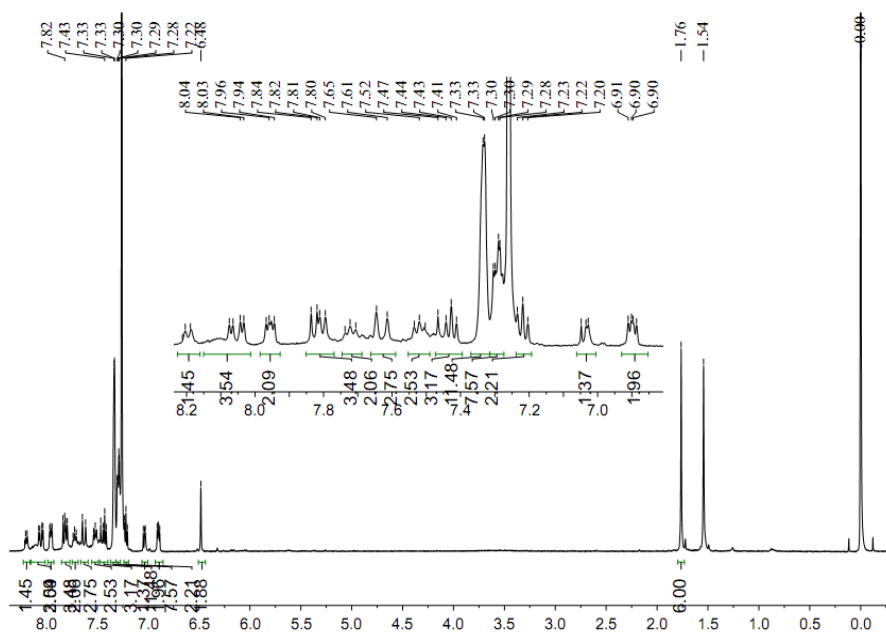

**Figure S3.**  $^1\text{H}$  NMR spectrum of compound **2b** ( $\text{CDCl}_3$ , 298 K)

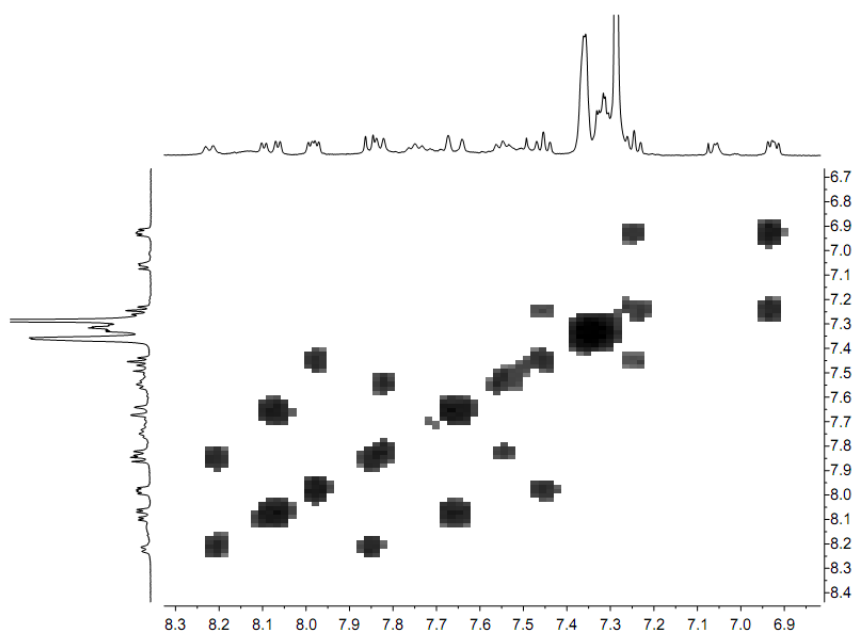

**Figure S4.**  $^1\text{H}$ - $^1\text{H}$  COSY spectrum of compound **2b** ( $\text{CDCl}_3$ , 298 K).

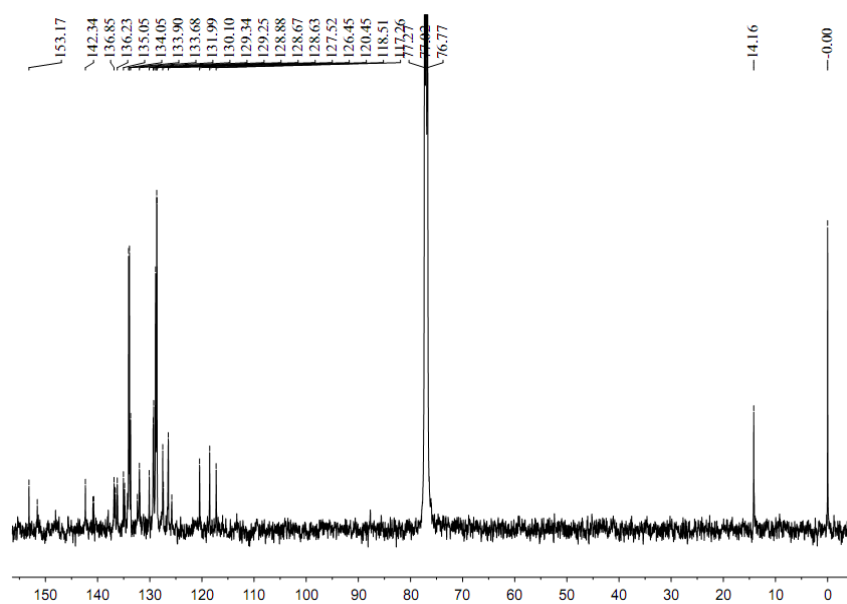

**Figure S5.** <sup>13</sup>C NMR spectrum of compound **2b** (CDCl<sub>3</sub>, 298 K).

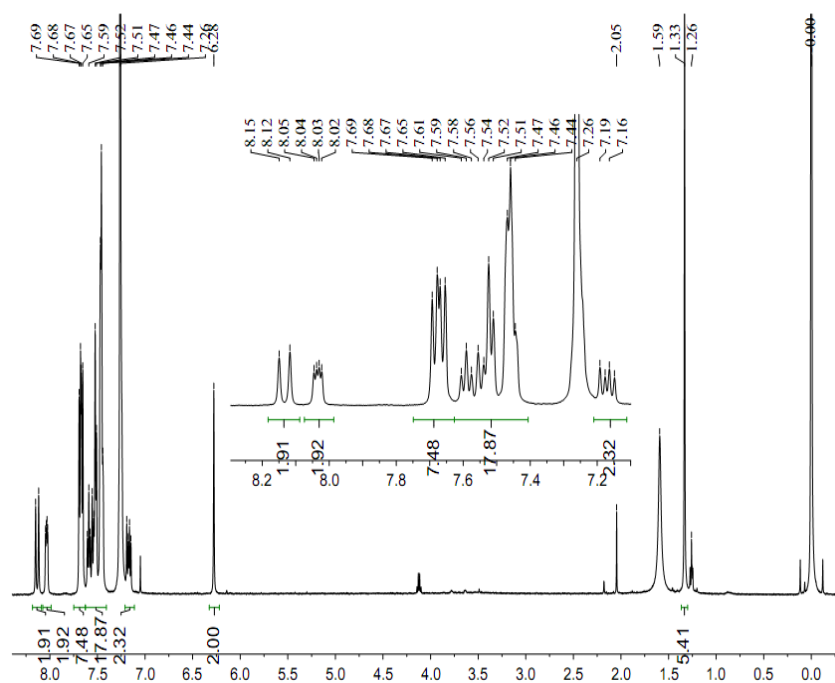

**Figure S6.** <sup>1</sup>H NMR spectrum of compound **ox-2a** (CDCl<sub>3</sub>, 298 K)

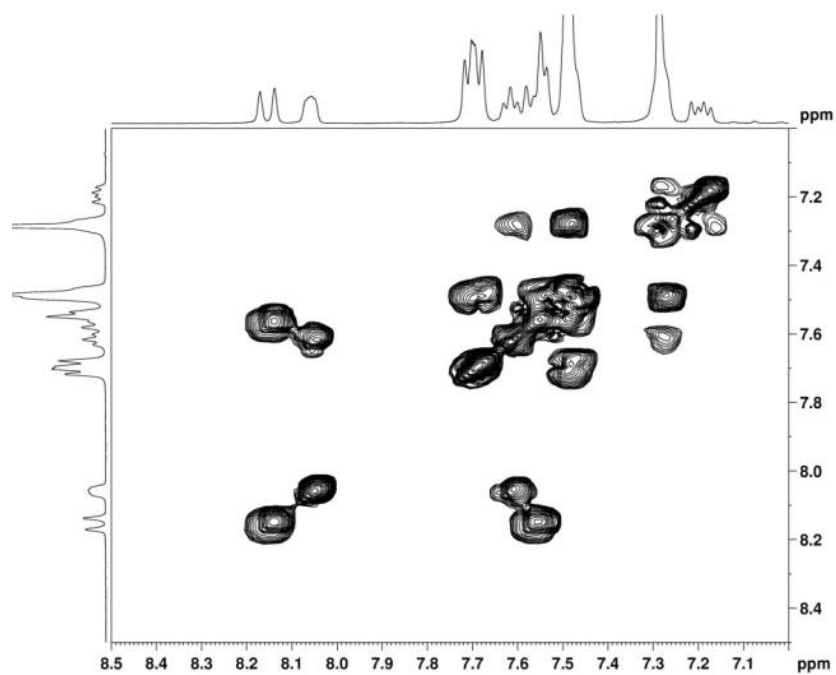

**Figure S7.** <sup>1</sup>H-<sup>1</sup>H COSY spectrum of compound **ox-2a** (CDCl<sub>3</sub>, 298 K)

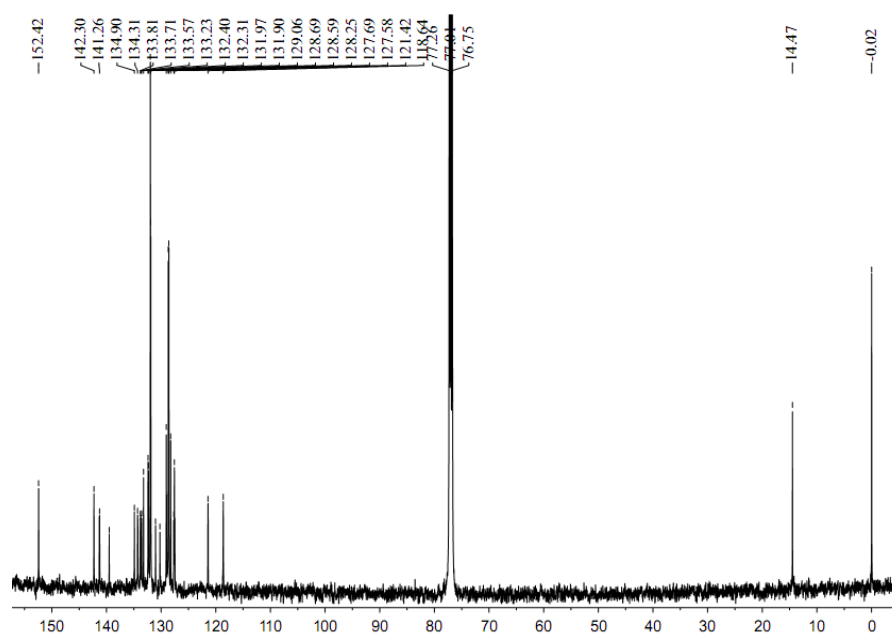

**Figure S8.** <sup>13</sup>C NMR spectrum of compound **ox-2a** (CDCl<sub>3</sub>, 298 K).

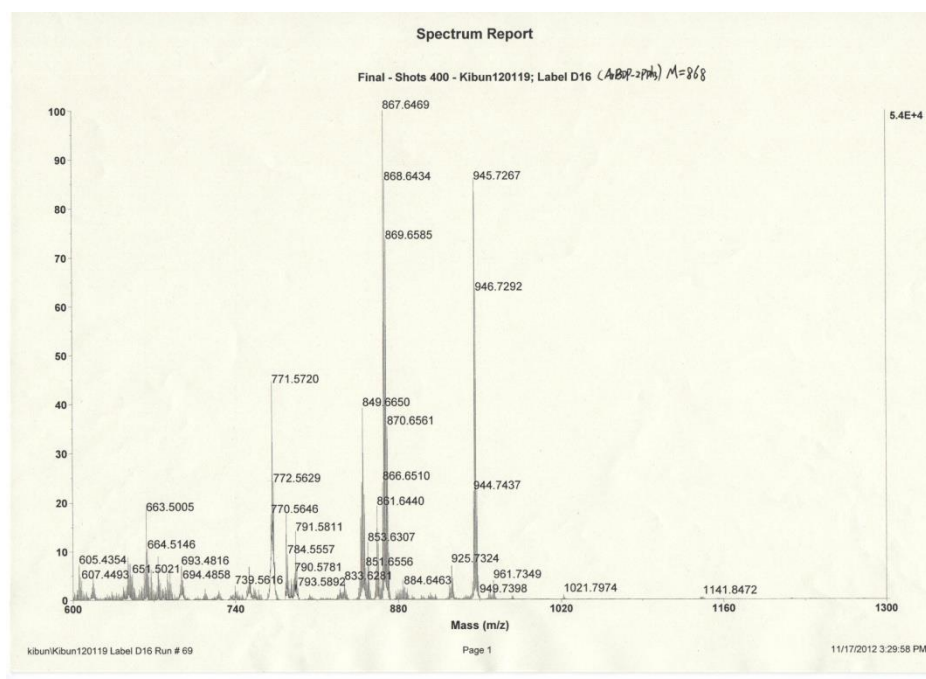

**Figure S9.** MALDI-TOF MS spectrum of compound **2a** .

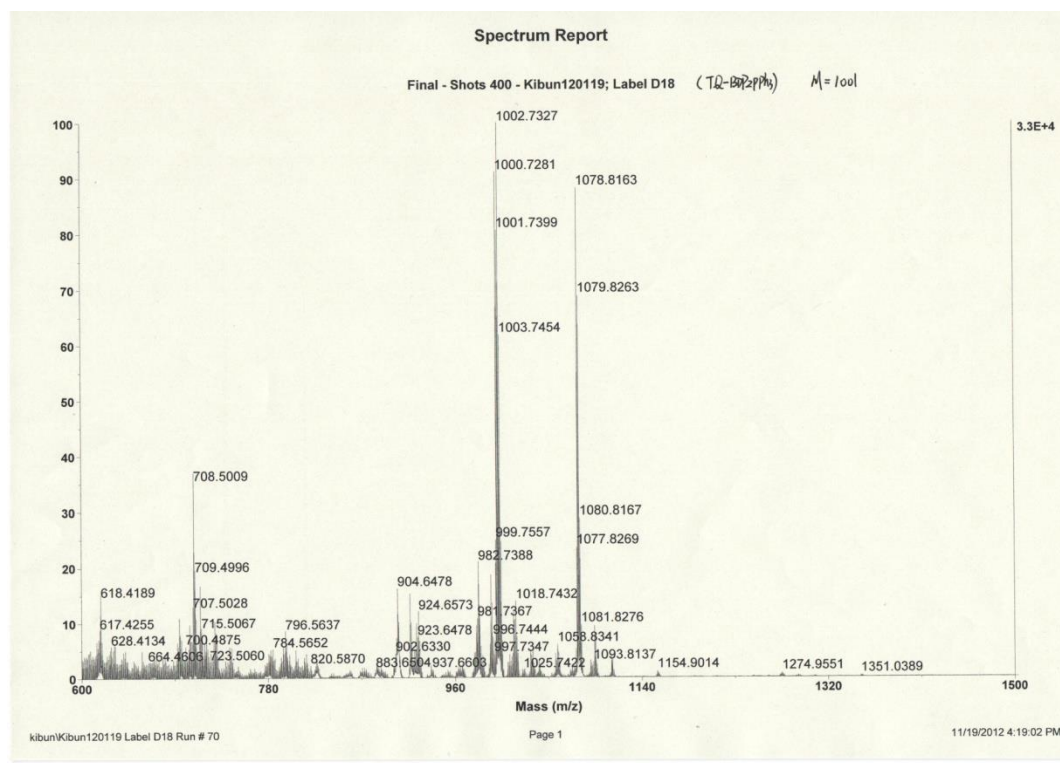

**Figure S10.** MALDI-TOF MS spectrum of compound **2b** .



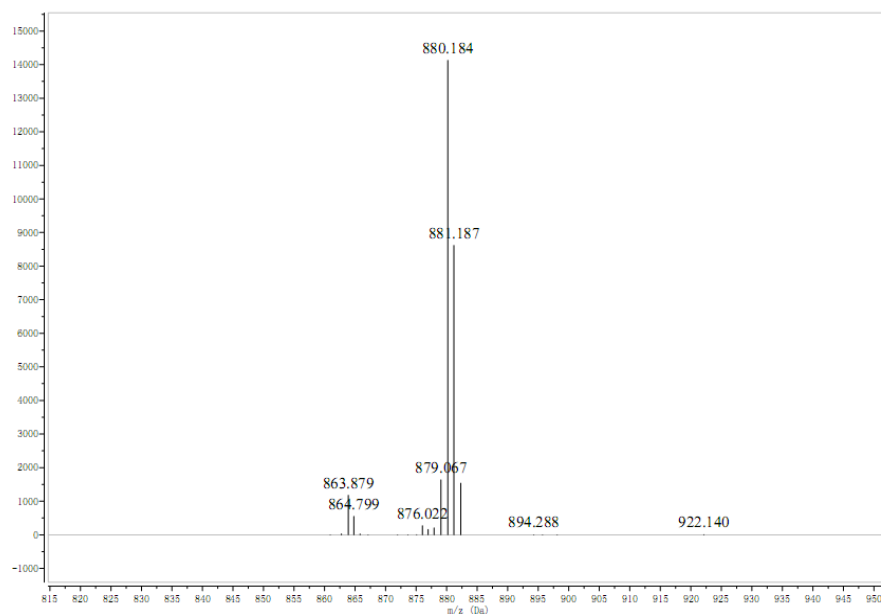

**Figure S11.** MALDI-TOF MS spectrum of compound **ox-2a**.

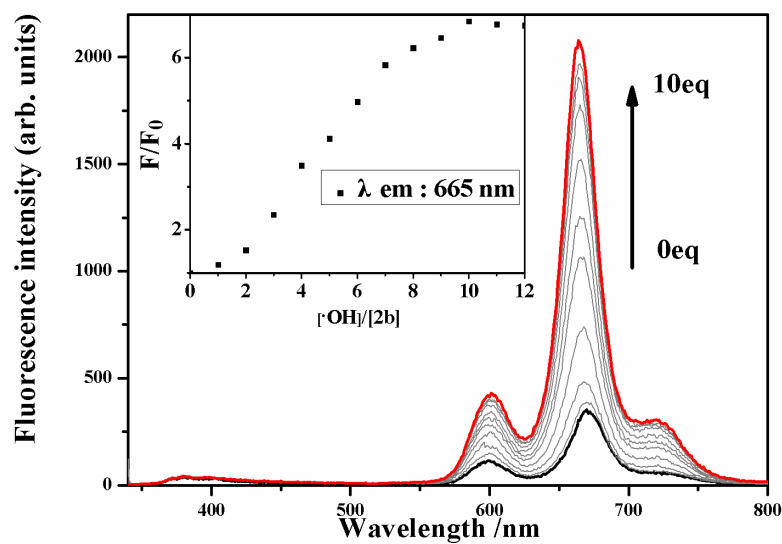

**Figure S12.** Changes in the fluorescence spectrum of **2b** (10  $\mu$ M in DMSO) as the  $\bullet$ OH concentration is increased upon excitation at 334 nm. The inset shows that the emission intensity at 665 nm changes as a function of the  $\bullet$ OH concentration

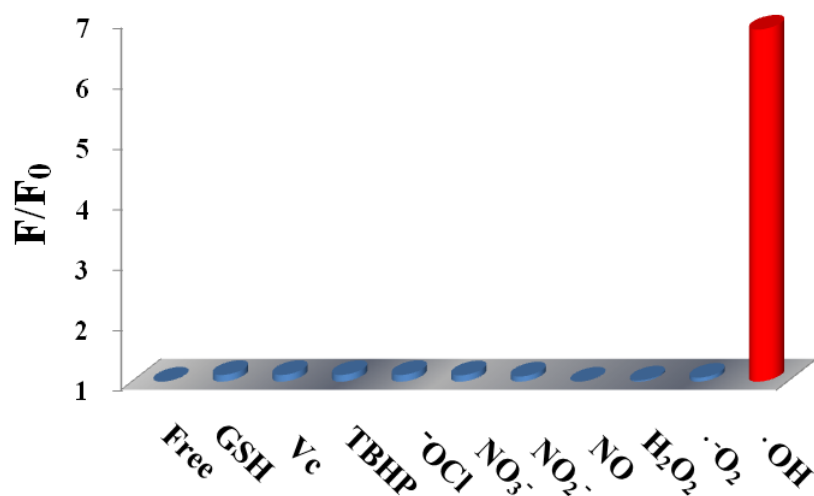

**Figure S13.** The fluorescence intensity of **2b** is observed at 665 nm upon addition of various RON/ROS upon excitation at 334 nm.

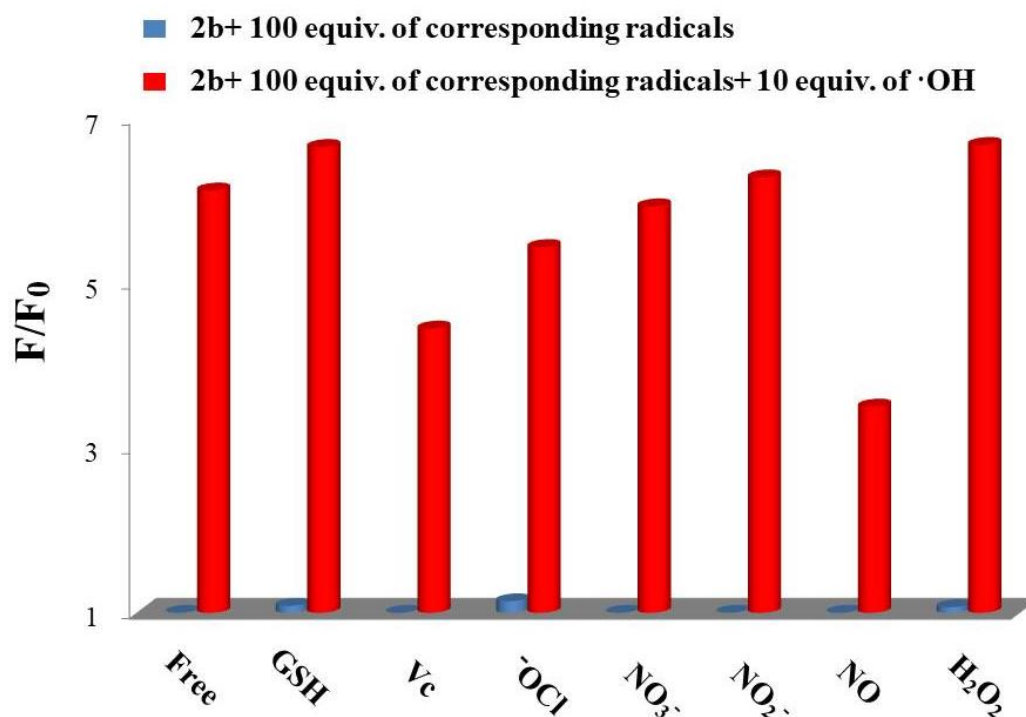

**Figure S14.** Fluorescence intensity ratio histograms of **2b** dispersed in DMSO with the adding of corresponding radicals (red) and subsequent adding of 10 equiv. of  $\cdot\text{OH}$  (blue).

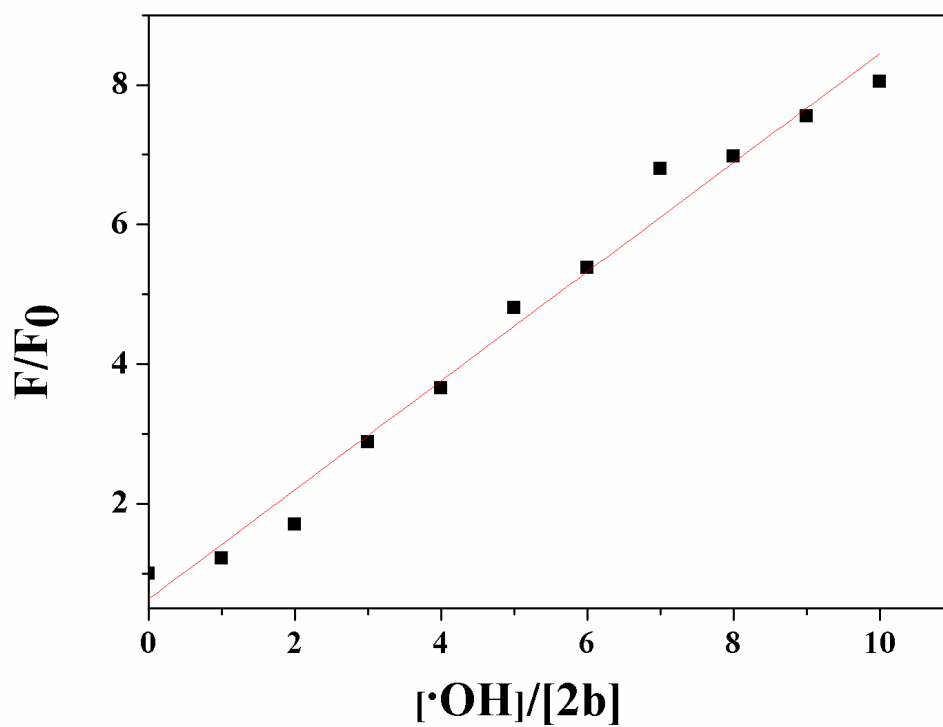

**Figure S15.** Fluorescence intensity of probe **2b** after reacting with  $\cdot\text{OH}$  as a function of  $\cdot\text{OH}$  concentration

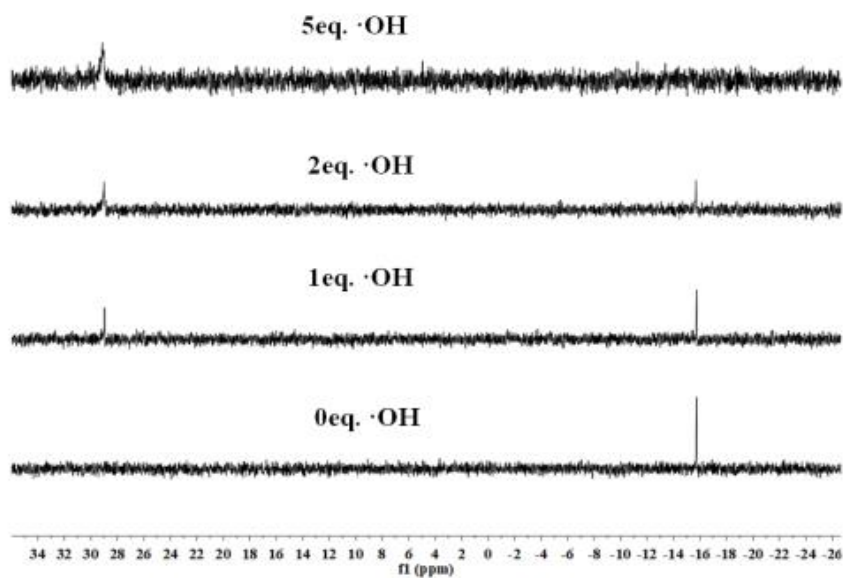

**Figure S16.**  $^{31}\text{P}$  NMR of **2b** with different concentrations of  $\cdot\text{OH}$  in  $\text{DMSO-d}_6$ .

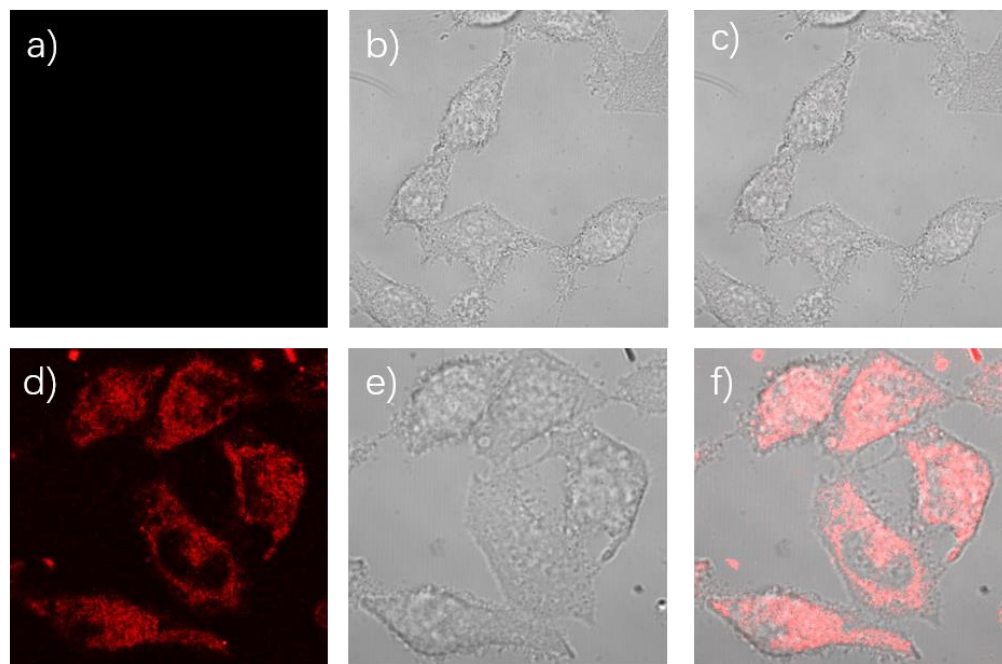

**Figure S17.** Confocal fluorescence and brightfield images of HeLa cells. (a) Cells incubated with 10  $\mu\text{M}$  of **2b** for 30 min at 37  $^{\circ}\text{C}$ . (b) Brightfield image of cells showed in panel a. (c) One overlay image of (a) and (b). (d) Cells incubated with 10  $\mu\text{M}$  **2b** and  $\text{H}_2\text{O}_2$  (1mM) at 37  $^{\circ}\text{C}$  for 30min. (e) Brightfield image of cells showed in panel d. (f) One overlay image of (d) and (e).

**Table S1.** Crystal data and structure refinement for **ox-2a**

| Parameters name                 | Data                                                                                         | Parameters name                            | Data                                                               |
|---------------------------------|----------------------------------------------------------------------------------------------|--------------------------------------------|--------------------------------------------------------------------|
| Empirical formula               | C <sub>57</sub> H <sub>45</sub> BF <sub>2</sub> N <sub>2</sub> O <sub>2</sub> P <sub>2</sub> | Density (calc.) Mg/m <sup>3</sup>          | 1.276                                                              |
| Formula weight                  | 900.3                                                                                        | Absorption coefficient (mm <sup>-1</sup> ) | 0.146                                                              |
| Crystal size (mm <sup>3</sup> ) | 0.18×0.15×0.11                                                                               | Temperature (K)                            | 123(2)                                                             |
| Crystal system                  | Monoclinic                                                                                   | F(000)                                     | 1880                                                               |
| Space group                     | <i>P</i> 2(1)/ <i>c</i>                                                                      | Goodness of fit on F <sup>2</sup>          | 1.028                                                              |
| Z                               | 4                                                                                            | Max. and min. absorption                   | 0.9841 and 0.9741                                                  |
| <i>a</i> / Å                    | 16.460(7)                                                                                    | range for data collection (°)              | 1.93 to 28.37                                                      |
| <i>b</i> / Å                    | 12.384(4)                                                                                    | Index ranges                               | -20 ≤ <i>h</i> ≤ 20,<br>-15 ≤ <i>k</i> ≤ 7,<br>-28 ≤ <i>l</i> ≤ 28 |
| <i>c</i> / Å                    | 23.223(10)                                                                                   | Total reflections                          | 4617                                                               |
| <i>α</i> / (deg)                | 90                                                                                           | Independent reflections                    | 2686 [ <i>R</i> <sub>(int)</sub> = 0.1167]                         |
| <i>β</i> / (deg)                | 97.818(9)                                                                                    | Parameters                                 | 277                                                                |
| <i>γ</i> / (deg)                | 90                                                                                           | Final <i>R</i> indices [ <i>I</i> > 2]     | <i>R</i> <sub>1</sub> = 0.1051<br><i>wR</i> <sub>2</sub> = 0.1357  |
| Volume / Å <sup>3</sup>         | 4690(3)                                                                                      | <i>R</i> indices (all data)                | <i>R</i> <sub>1</sub> = 0.0495<br><i>wR</i> <sub>2</sub> = 0.1176  |

**Table S2.** Optical properties of **2a**, **2b** and **ox-2a** in various solvents at 298 K

| compound     | solvent                         | $\lambda_{\text{abs}}^{\text{max}}(\text{nm})$ | $\lambda_{\text{em}}^{\text{ex334}}$<br>(nm) | $\lambda_{\text{em}}^{\text{acceptor}}$<br>(nm) | $\Phi_{\text{f}}^{\text{ex334}}$ | $\Phi_{\text{f}}^{\text{acceptor}}$ | ETE  |
|--------------|---------------------------------|------------------------------------------------|----------------------------------------------|-------------------------------------------------|----------------------------------|-------------------------------------|------|
| <b>2a</b>    | Hexane                          | 628, 578, 345                                  | —                                            | 644                                             | —                                | 0.77                                | —    |
|              | CH <sub>2</sub> Cl <sub>2</sub> | 633, 577, 350                                  | —                                            | 650                                             | —                                | 0.72                                | —    |
|              | CH <sub>3</sub> OH              | 625, 576, 345                                  | —                                            | 641                                             | —                                | 0.57                                | —    |
|              | CH <sub>3</sub> CN              | 624, 574, 344                                  | —                                            | 642                                             | —                                | 0.25                                | —    |
|              | DMSO                            | 631, 582                                       | —                                            | 650                                             | —                                | 0.20                                | —    |
| <b>2b</b>    | Hexane                          | 645, 591, 352                                  | 660                                          | 660                                             | 0.46                             | 0.29                                | 157% |
|              | CH <sub>2</sub> Cl <sub>2</sub> | 650, 594, 356                                  | 667                                          | 668                                             | 0.54                             | 0.32                                | 169% |
|              | CH <sub>3</sub> OH              | 640, 590, 353                                  | 659                                          | 658                                             | 0.33                             | 0.22                                | 150% |
|              | CH <sub>3</sub> CN              | 639, 590, 352                                  | 659                                          | 659                                             | 0.11                             | 0.8                                 | 138% |
|              | DMSO                            | 650, 594                                       | 668                                          | 666                                             | 0.06                             | 0.08                                | 75%  |
| <b>ox-2a</b> | Hexane                          | 625, 581, 350                                  | —                                            | 641                                             | —                                | 0.85                                | —    |
|              | CH <sub>2</sub> Cl <sub>2</sub> | 630, 584, 355                                  | —                                            | 646                                             | —                                | 0.74                                | —    |
|              | CH <sub>3</sub> OH              | 624, 574, 353                                  | —                                            | 638                                             | —                                | 0.81                                | —    |
|              | CH <sub>3</sub> CN              | 622, 576, 350                                  | —                                            | 638                                             | —                                | 0.78                                | —    |
|              | DMSO                            | 628, 581                                       | —                                            | 645                                             | —                                | 0.69                                | —    |
